# Supplementary material
Source: Research Square preprint supplement (doi:10.21203/rs.3.rs-9343237/v1)

**Title**

Bioprocessing method is a critical factor for IgM oligomerization

**Authors**

Öykü Üzülmez1, Vanessa Hawlin1, Maria Magdalena John1, Katharina Stadlbauer2, Julia Hennicke1, Monika Hunjadi1, Gordana Wozniak-Knopp2, Renate Kunert1*

1 Department of Biotechnology and Food Sciences, Institute of Animal Cell Technology and Systems Biology, BOKU University, Vienna, Austria

2 Department of Biotechnology and Food Sciences, Institute of Molecular Biotechnology, BOKU University, Vienna, Austria

*Corresponding author: renate.kunert@boku.ac.at

Supplementary Materials

Figure S1. Raw NativePAGE images for Figure 1.

Fig.1 Marker lane


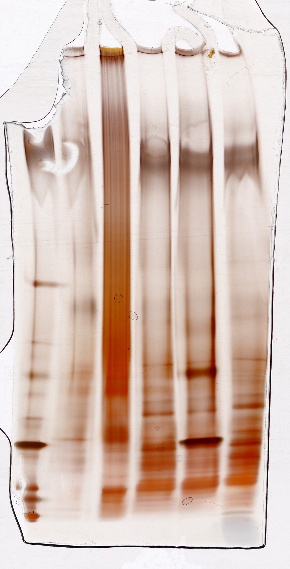

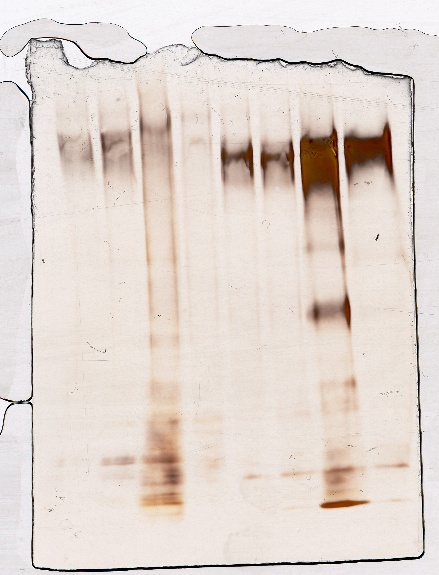

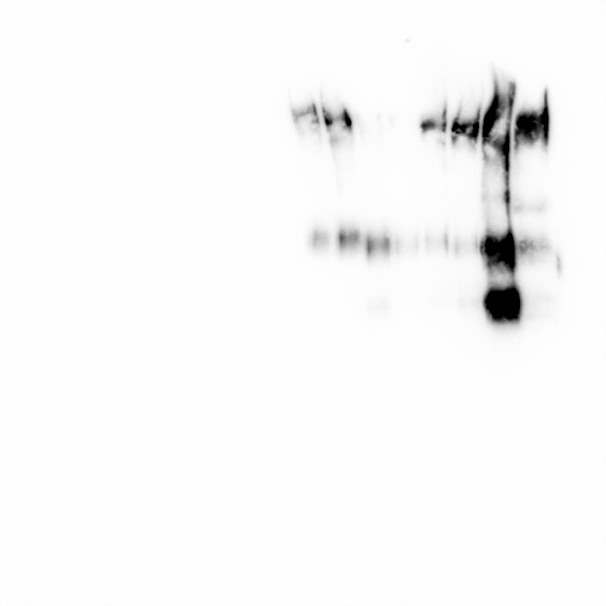


Anti-µ HRP staining (Fig.1 right)

Silver staining (Fig.1 left)

Figure S2. Raw NativePAGE image for Figure 4D.


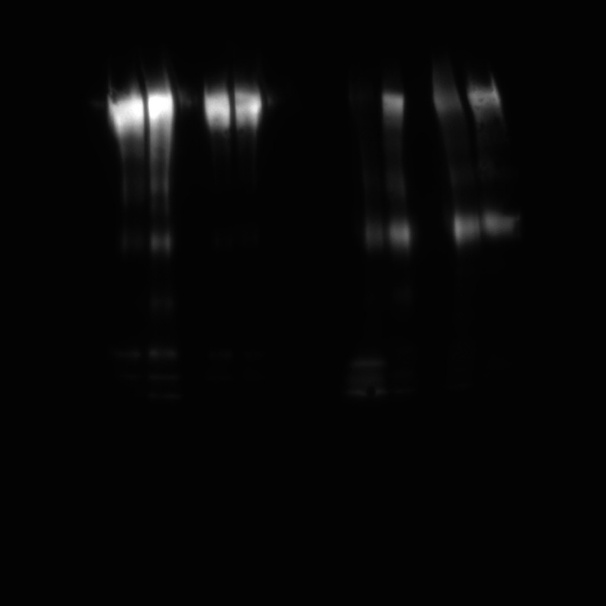

Supplement: Supplementary file 1 [file 0512330eb896ad517f4fa16a.docx]
